# Supplementary material for: Polymer-coated carbon nanotube hybrids with functional peptides for gene delivery into plant mitochondria
Source: PubMed Central journal article supplement (PMC9110379; doi:10.1038/s41467-022-30185-y), 2022-05-16
Supplement: 41467_2022_30185_MOESM3_ESM.pdf [file 41467_2022_30185_MOESM3_ESM.pdf]

## **Description of Additional Supplementary Files**

Supplementary Data 1 and 2 contain the raw sequence reads from genotyped PCR products from the 5` and 3` arms of pAtMTTF1 transformants 7 days after infiltration with SWNT-PM-CytKH9/pDNA (Fig. 6 and Supplementary Fig. 15).

**Supplementary Data 1.** Primer 1 read

**Supplementary Data 2.** Primer 4 read

Supplementary Data 3 to 5 contain the raw MALDI-TOF/MS analysis of the SWNT NCs Fig. 2d and Supplementary Fig. 4).

**Supplementary Data 3.** MALDI-TOF/MS analysis of SWNT-PM

**Supplementary Data 4.** MALDI-TOF/MS analysis of SWNT-PM-Cytcox

**Supplementary Data 5.** MALDI-TOF/MS analysis of SWNT-PM-CytKH9
